# Supplementary material for: Whole exome sequencing of a consanguineous family identifies the possible modifying effect of a globally rare AK5 allelic variant in celiac disease development among Saudi patients
Source: PubMed Central journal article supplement (PMC5432167; doi:10.1371/journal.pone.0176664), 2017-05-15
Supplement: pone.0176664.s001.pdf [file pone.0176664.s001.pdf]

S1 Table: Primer sequences of prioritized gene list from exome celiac study

| S.No | Gene   | Chromosome Position | Ref/Alternate Bases      | Primer (Forward(F): Reverse (R)) |                              |
|------|--------|---------------------|--------------------------|----------------------------------|------------------------------|
| 1.   | AK5    | 01:78024349-49      | -/ ATT                   | GCAGAGCAAATTATG<br>AGC (F)       | TAGCTGGGAAGCAAA<br>CAGT(R)   |
| 2.   | VSIG10 | 12:118506348-53     | CTCCTC/-                 | TCAGTGAGGGCTGAA<br>GTTGG(F)      | AAGGCGGTCACTCTG<br>TGAAT(R)  |
| 3.   | WNK2   | 09:96051100-100     | C/T                      | GTCGGGAAACAGAGA<br>AGACCA(F)     | GAGCTGCTGACTGGC<br>TAGAAA(R) |
| 4.   | DOK3   | 05:176930176-178    | AGG/-                    | AACCGATGACGTATC<br>AGGCA(F)      | AGGTTCAAGGATGTGC<br>CAAGG(R) |
| 5.   | GNAL   | 18:11689680-680     | -/ TGGCCC                | GGGTCTGTGCTACAG<br>TCTGC(F)      | GCTTCTCCTTCGGCTT<br>GTCT(R)  |
| 6.   | FNDC1  | 06:159660804-821    | CCCGCCGCA<br>CGACCACCA/- | TGAGTCTTGGAGGAA<br>AGC(F)        | TCAGGTTGCCATCATC<br>GT(R)    |
| 7.   | LCORL  | 04:17883693-693     | -/AC                     | GAACACTGAAGACTC<br>CTCCGA(F)     | CACACAAATACACAC<br>CTG(R)    |
| 8.   | PACRG  | 06:163149189-189    | C/T                      | TGGAAGCTTGTTGCA<br>GCTCT(F)      | TTCAGGAAGATCACT<br>TACGA(R)  |
